## **Meteorological Conditions and Covid-19 in Large U.S. Cities**

Hisato Takagi, M.D., Ph.D., Toshiki Kuno, M.D., Ph.D., Yujiro Yokoyama, M.D., Hiroki Ueyama, M.D., Takuya Matsushiro, M.D. Yosuke Hari, M.D., Tomo Ando, M.D.

Shizuoka Medical Center, Shizuoka, Kitasato University, School of Medicine, Sagamihara, Japan (HT, TM, YH), Mount Sinai Beth Israel Medical Center, New York, NY, USA (TK, HU), Easton Hospital, Easton, PA, USA (YY), New York Presbyterian Hospital/Columbia University Medical Center, New York, NY, USA (TA)

## Abstract

To determine whether prevalence of Coronavirus disease 2019 (Covid-19) is modulated by meteorological conditions, we herein conducted meta-regression of data in large U.S. cities. We selected 33 large U.S. cities with a population of >500,000. The integrated numbers of confirmed Covid-19 cases in the country to which the city belongs on 14 May 2020, the estimated population in 2019 in the country, and monthly meteorological conditions at the city for 4 months (from January to April 2020) were obtained. Meteorological conditions consisted of mean temperature (F), total precipitation (inch), mean wind speed (MPH), mean sky cover, and mean relative humidity (%). Monthly data for 4 months were averaged or integrated. The Covid-19 prevalence was defined as the integrated number of Covid-19 cases divided by the population. Random-effects meta-regression was performed by means of OpenMetaAnalyst. In a meta-regression graph, Covid-19 prevalence (plotted as the logarithm transformed prevalence on the y-axis) was depicted as a function of a given factor (plotted as a meteorological datum on the x-axis). A slope of the meta-regression line was significantly negative (coefficient,  $-0.069$ ;  $P < 0.001$ ) for the mean temperature and significantly positive for the mean wind speed (coefficient,  $0.174$ ;  $P = 0.027$ ) and the sky cover (coefficient,  $2.220$ ;  $P = 0.023$ ). In conclusion, lower temperature and higher wind speed/sky cover may be associated with higher Covid-19 prevalence, which should be confirmed by further epidemiological researches adjusting for various risk and protective factors (in addition to meteorological conditions) of Covid-19.

## Text

### Introduction

Higher temperature and ultraviolet (UV) index in Northern Europe have been reported as the most important meteorological protective factors for the transmission of influenza virus.<sup>1</sup> On the other hand, a recent study in China suggests that higher temperature and UV radiation may not be associated with a decrease in the epidemics of Coronavirus disease 2019 (Covid-19).<sup>2</sup> To determine whether prevalence of COVID-19 is modulated by meteorological conditions, we herein conducted meta-regression of data in large U.S. cities.

### Methods

We selected 33 large U.S. cities with a population of >500,000 in 2010 from the U.S. Census Bureau (<http://www.census.gov>). The integrated numbers of confirmed Covid-19 cases in the country to which the city belongs on 14 May 2020 from the Johns Hopkins Coronavirus Resource Center (<https://coronavirus.jhu.edu>), the estimated population in 2019 in the country from the U.S. Census Bureau, and monthly meteorological conditions at the city for 4 months (from January to April 2020) from the National Weather Service (<https://www.weather.gov>) were obtained (**Table 1**). Meteorological conditions consisted of mean temperature (F), total precipitation (inch), mean wind speed (MPH), mean sky cover, and mean relative humidity (%). Monthly data for 4 months were averaged or integrated. The Covid-19 prevalence was defined as the integrated number of Covid-19 cases divided by the population. Random-effects meta-regression was performed by means of OpenMetaAnalyst

(<http://www.cebm.brown.edu/openmeta/index.html>). In a meta-regression graph, Covid-19 prevalence (plotted as the logarithm transformed prevalence on the y-axis) was depicted as a function of a given factor (plotted as the meteorological data on the x-axis).

## Results

Results of the meta-regression were summarized in **Table 2**. A slope of the meta-regression line was significantly negative (coefficient,  $-0.069$ ;  $P < 0.001$ ; **Figure 1**, upper panel) for the mean temperature (indicating that Covid-19 prevalence decreased significantly as the mean temperature increased) and significantly positive for the mean wind speed (coefficient,  $0.174$ ;  $P = 0.027$ ; **Figure 1**, middle panel) and the sky cover (coefficient,  $2.220$ ;  $P = 0.023$ ; **Figure 1**, lower panel) (indicating that Covid-19 prevalence increased significantly as the mean wind speed and the sky cover increased).

## Discussion and Conclusion

The present meta-regression suggests that temperature may be negatively and wind speed/sky cover may be positively associated with COVID-19 prevalence. Higher sky cover is probably related to lower UV radiation. Our recent preliminary study of Japanese prefectural data suggests that temperature and UV index may be negatively associated with COVID-19 prevalence,<sup>3</sup> which could strengthen the present findings. Despite the association of lower temperature and UV index with the influenza transmission,<sup>1</sup> no association of temperature and UV radiation with the COVID-19 epidemics has been reported,<sup>2</sup> however, which may be denied by the present results of the association of lower temperature and higher sky cover with higher COVID-19 prevalence. In conclusion, lower temperature and higher wind speed/sky cover may be

associated with higher Covid-19 prevalence, which should be confirmed by further epidemiological researches adjusting for various risk and protective factors (in addition to meteorological conditions) of Covid-19.

## References

1. Ianevski A, Zusinaite E, Shtaida N, et al. Low Temperature and Low UV Indexes Correlated with Peaks of Influenza Virus Activity in Northern Europe during 2010–2018. *Viruses* 2019;11:207.
2. Yao Y, Pan J, Liu Z, et al. No association of COVID-19 transmission with temperature or UV radiation in Chinese cities. *Eur Respir J* 2020;55:2000517.
3. Takagi H, Kuno T, Yokoyama Y, et al. Higher Air Temperature, Pressure, and Ultraviolet Are Associated with Less Covid-19 Incidence. *medRxiv* 2020 May 13. doi: 10.1101/2020.05.09.20096321.

## Figure legends

**Figure 1.** Meta-regression graph depicting covid-19 prevalence (plotted as the logarithm transformed prevalence on the y-axis) as a function of the given factors (plotted as the meteorological data on the x-axis).

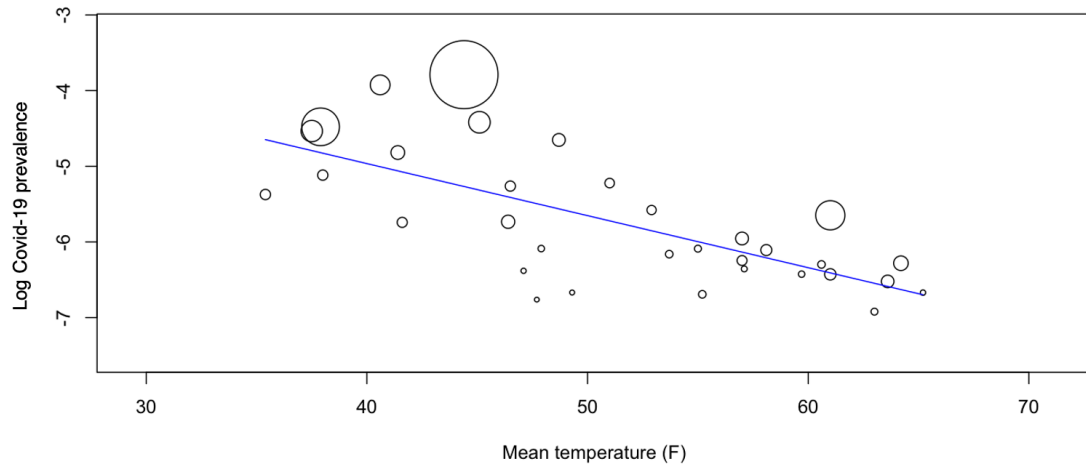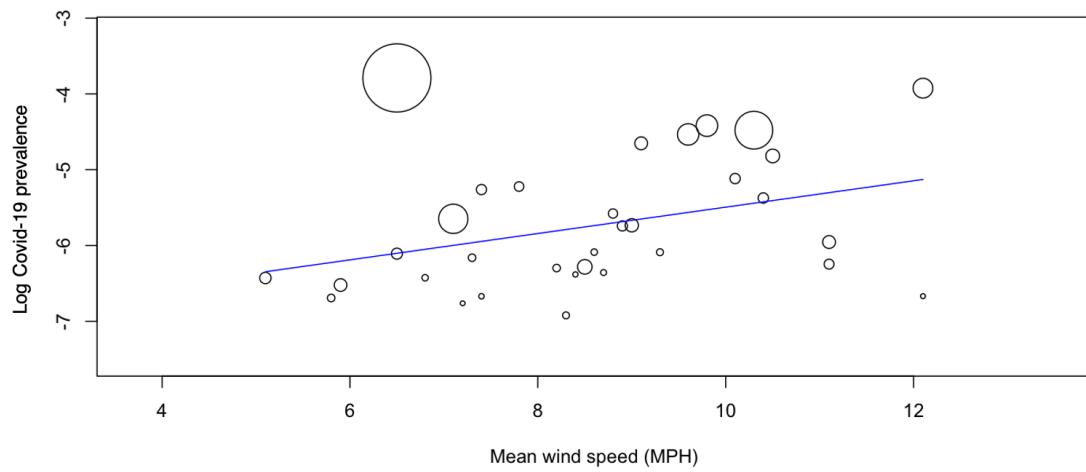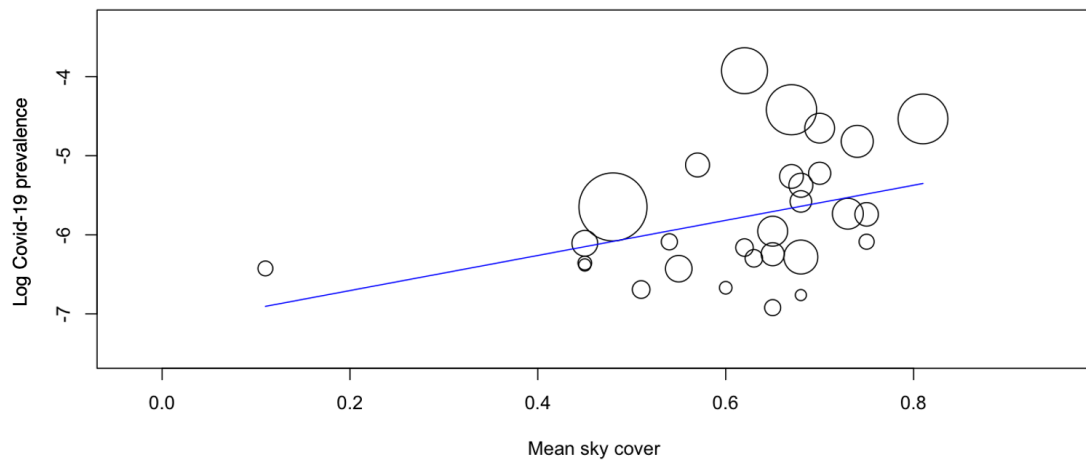

**Table 1. Extracted data in each large U.S. city and country to which the city belongs.**

| City          | State          | County        | Covid-19 prevalence in the country |                |            | Meteorological condition at the city |                            |                       |                |                            |
|---------------|----------------|---------------|------------------------------------|----------------|------------|--------------------------------------|----------------------------|-----------------------|----------------|----------------------------|
|               |                |               | Cases (N)                          | Population (N) | Prevalence | Mean temperature (F)                 | Total precipitation (inch) | Mean wind speed (MPH) | Mean sky cover | Mean relative humidity (%) |
| Albuquerque   | New Mexico     | Bernalillo    | 1,149                              | 679,121        | 0.00169    | 47.1                                 | 1.65                       | 8.4                   | 0.45           | 43                         |
| Austin        | Texas          | Travis        | 2,345                              | 1,273,954      | 0.00184    | 60.6                                 | 12.06                      | 8.2                   | 0.63           | 72                         |
| Baltimore     | Maryland       | Baltimore     | 4,290                              | 827,370        | 0.00519    | 46.5                                 | 14.66                      | 7.4                   | 0.67           | 61                         |
| Boston        | Massachusetts  | Suffolk       | 15,881                             | 803,907        | 0.01975    | 40.6                                 | 12.62                      | 12.1                  | 0.62           | 58                         |
| Charlotte     | North Carolina | Mecklenburg   | 2,342                              | 1,110,356      | 0.00211    | 53.7                                 | 21.33                      | 7.3                   | 0.62           | 63                         |
| Chicago       | Illinois       | Cook          | 58,457                             | 5,150,233      | 0.01135    | 37.9                                 | 10.86                      | 10.3                  | –              | –                          |
| Columbus      | Ohio           | Franklin      | 4,227                              | 1,316,756      | 0.00321    | 41.6                                 | 19.31                      | 8.9                   | 0.75           | 67                         |
| Dallas        | Texas          | Dallas        | 6,837                              | 2,635,516      | 0.00259    | 57.0                                 | 17.53                      | 11.1                  | 0.65           | 70                         |
| Denver        | Colorado       | Denver        | 4,359                              | 727,211        | 0.00599    | 38.0                                 | 2.82                       | 10.1                  | 0.57           | 57                         |
| Detroit       | Michigan       | Wayne         | 18,770                             | 1,749,343      | 0.01073    | 37.5                                 | 11.35                      | 9.6                   | 0.81           | 73                         |
| D.C.          | D.C.           | –             | 6,736                              | 705,749        | 0.00954    | 48.7                                 | 14.61                      | 9.1                   | 0.70           | 63                         |
| El Paso       | Texas          | El Paso       | 1,456                              | 839,238        | 0.00173    | 57.1                                 | 3.07                       | 8.7                   | 0.45           | 40                         |
| Fort Worth    | Texas          | Tarrant       | 4,076                              | 2,102,515      | 0.00194    | 57.0                                 | 17.53                      | 11.1                  | 0.65           | 70                         |
| Houston       | Texas          | Harris        | 8,817                              | 4,713,325      | 0.00187    | 64.2                                 | 13.90                      | 8.5                   | 0.68           | 71                         |
| Indianapolis  | Indiana        | Marion        | 7,793                              | 964,582        | 0.00808    | 41.4                                 | 15.61                      | 10.5                  | 0.74           | 73                         |
| Jacksonville  | Florida        | Duval         | 1,215                              | 957,755        | 0.00127    | 65.2                                 | 6.36                       | 7.4                   | 0.60           | 68                         |
| Las Vegas     | Nevada         | Clark         | 5,045                              | 2,266,715      | 0.00223    | 58.1                                 | 2.31                       | 6.5                   | 0.45           | 37                         |
| Los Angeles   | California     | Los Angeles   | 35,392                             | 10,039,107     | 0.00353    | 61.0                                 | 7.17                       | 7.1                   | 0.48           | 62                         |
| Louisville    | Kentucky       | Jefferson     | 1,741                              | 766,757        | 0.00227    | 47.9                                 | 16.28                      | 8.6                   | 0.75           | 62                         |
| Memphis       | Tennessee      | Shelby        | 3,542                              | 937,166        | 0.00378    | 52.9                                 | 27.76                      | 8.8                   | 0.68           | 71                         |
| Milwaukee     | Wisconsin      | Milwaukee     | 4,387                              | 945,726        | 0.00464    | 35.4                                 | 10.52                      | 10.4                  | 0.68           | 66                         |
| Nashville     | Tennessee      | Davidson      | 3,745                              | 694,144        | 0.00540    | 51.0                                 | 23.11                      | 7.8                   | 0.70           | 64                         |
| New York City | New York       | New York City | 188,545                            | 8,336,817      | 0.02262    | 44.4                                 | 12.74                      | 6.5                   | –              | 57                         |
| Oklahoma City | Oklahoma       | Oklahoma      | 1,013                              | 797,434        | 0.00127    | 49.3                                 | 10.86                      | 12.1                  | –              | –                          |
| Philadelphia  | Pennsylvania   | Philadelphia  | 19,093                             | 1,584,064      | 0.01205    | 45.1                                 | 12.79                      | 9.8                   | 0.67           | 60                         |
| Phoenix       | Arizona        | Maricopa      | 6,599                              | 4,485,414      | 0.00147    | 63.6                                 | 3.55                       | 5.9                   | –              | 42                         |
| Portland      | Oregon         | Multnomah     | 940                                | 812,855        | 0.00116    | 47.7                                 | 12.35                      | 7.2                   | 0.68           | 71                         |
| San Antonio   | Texas          | Bexar         | 1,976                              | 2,003,554      | 0.00099    | 63.0                                 | 7.35                       | 8.3                   | 0.65           | 66                         |
| San Diego     | California     | San Diego     | 5,391                              | 3,338,330      | 0.00161    | 61.0                                 | 6.69                       | 5.1                   | 0.55           | 69                         |
| San Francisco | California     | San Francisco | 1,999                              | 881,549        | 0.00227    | 55.0                                 | 3.86                       | 9.3                   | 0.54           | 69                         |
| San José      | California     | Santa Clara   | 2,391                              | 1,927,852      | 0.00124    | 55.2                                 | 4.06                       | 5.8                   | 0.51           | 65                         |
| Seattle       | Washington     | King          | 7,290                              | 2,252,782      | 0.00324    | 46.4                                 | 18.15                      | 9.0                   | 0.73           | 73                         |
| Tucson        | Arizona        | Pima          | 1,696                              | 1,047,279      | 0.00162    | 59.7                                 | 2.09                       | 6.8                   | 0.11           | 40                         |

**Supplementary Table 2. Meta-regression summary.**

| Covariate                  | Coefficient |        |             | Standard error | P value |
|----------------------------|-------------|--------|-------------|----------------|---------|
|                            | Lower bound |        | Upper bound |                |         |
| Mean temperature (F)       | -0.069      | -0.093 | -0.045      | 0.012          | <0.001  |
| Total precipitation (inch) | 0.038       | -0.004 | -0.081      | 0.022          | 0.075   |
| Mean wind speed (MPH)      | 0.174       | 0.020  | 0.328       | 0.079          | 0.027   |
| Mean sky cover             | 2.220       | 0.313  | 4.128       | 0.973          | 0.023   |
| Mean relative humidity (%) | 0.007       | -0.020 | 0.035       | 0.014          | 0.613   |
